# Supplementary material for: NiO/Ce1−xNixO2−δas an alternative to noble metal catalysts for CO oxidation
Source: Royal Society of Chemistry journal article supplement (doi:10.1039/c2cy20641b), 2012-10-30
Supplement: c2cy20641b.pdf [file c2cy20641b.pdf]

## NiO/Ce<sub>1-x</sub>Ni<sub>x</sub>O<sub>2-δ</sub> as an alternative to noble metal catalysts for CO oxidation.

Sk. Mahammadunnisa<sup>a</sup>, P. Manoj kumar reddy<sup>a</sup>, N. Lingaiah<sup>b</sup>, Ch. Subrahmanyam<sup>a\*</sup>

<sup>a</sup>Energy and Environmental Research Laboratory, Department of Chemistry, Indian Institute of Technology Hyderabad, Andhra Pradesh, India-502205.

<sup>b</sup>Catalysis Laboratory, I&PC Division, Indian Institute of Chemical Technology, Hyderabad, 500 007 India.

---

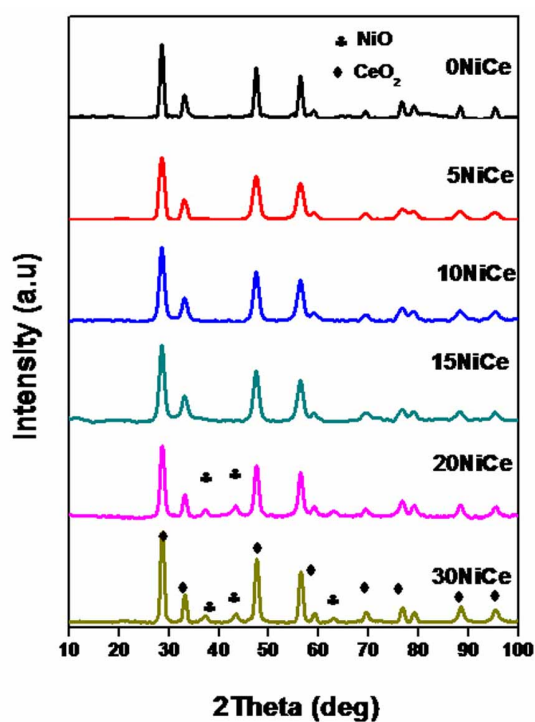

Fig S1. XRD patterns of the spent catalysts

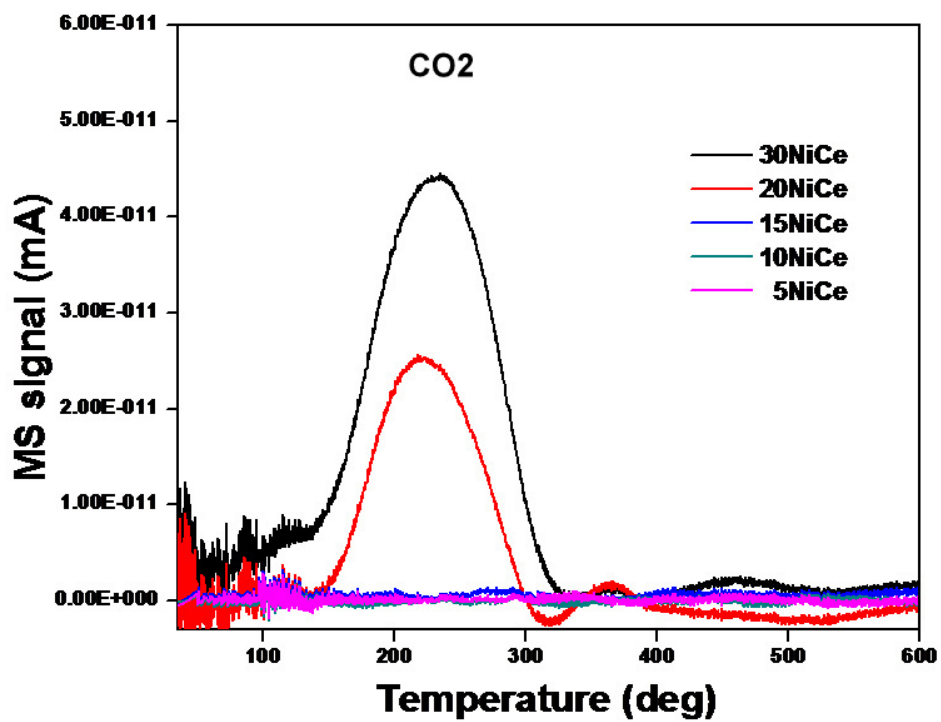

Fig S2: Temperature programmed decomposition of spent catalysts
